# Supplementary material for: A thermodynamic criterion for the choice of flux and its validity in NaBO2-fluxed β-BaB2O4 crystal growth
Source: Royal Society of Chemistry journal article supplement (doi:10.1039/d2ce00250g), 2022-01-01
Supplement: d2ce00250g1.pdf [file d2ce00250g1.pdf]

# A thermodynamic criterion for the choice of flux and its validity in the NaBO<sub>2</sub>-fluxed $\beta$ -BaB<sub>2</sub>O<sub>4</sub> crystal growth

Wen Luo,<sup>ab</sup> Songming Wan,<sup>\*bc</sup> Shengjie Jiang<sup>b</sup> and Bin Li<sup>b</sup>

<sup>a</sup> Institutes of Physical Science and Information Technology, Anhui University, Hefei 230601, China

<sup>b</sup> Anhui Provincial Key Laboratory of Photonics Devices and Materials, Anhui Institute of Optics and Fine Mechanics, HFIPS, Chinese Academy of Sciences, Hefei 230031, China

<sup>c</sup> Advanced Laser Technology Laboratory of Anhui Province, Hefei 230037, China

## Table of Contents

|                                                                                                                                                                                                                                                                  |    |
|------------------------------------------------------------------------------------------------------------------------------------------------------------------------------------------------------------------------------------------------------------------|----|
| <b>Growth of the <math>\beta</math>-BaB<sub>2</sub>O<sub>4</sub> crystal</b>                                                                                                                                                                                     | S2 |
| <b>Computations for the band structures and thermodynamic properties of <math>\beta</math>-BaB<sub>2</sub>O<sub>4</sub> and NaBO<sub>2</sub></b>                                                                                                                 | S3 |
| <b>Estimation of the atomic chemical potentials of <math>\beta</math>-BaB<sub>2</sub>O<sub>4</sub> and NaBO<sub>2</sub></b>                                                                                                                                      | S4 |
| <b>Fig S4.</b> Computational phonon dispersions and densities of states for $\beta$ -BaB <sub>2</sub> O <sub>4</sub> and NaBO <sub>2</sub> .                                                                                                                     | S5 |
| <b>Table S2.</b> Primitive cell parameters of $\beta$ -BaB <sub>2</sub> O <sub>4</sub> and NaBO <sub>2</sub> at different volume expansion rates                                                                                                                 | S6 |
| <b>Table S3.</b> Computational valence-band-edge ( $E_{VB}$ ) and conduction-band-edge ( $E_{CB}$ ) positions of $\beta$ -BaB <sub>2</sub> O <sub>4</sub> and NaBO <sub>2</sub> with different expansion ratios and the corresponding atomic chemical potentials | S6 |
| <b>References</b>                                                                                                                                                                                                                                                | S7 |

## Growth of the $\beta$ -BaB<sub>2</sub>O<sub>4</sub> crystal

BaB<sub>2</sub>O<sub>4</sub> polycrystalline raw material was synthesized through a solid-state reaction. Stoichiometric amounts of BaCO<sub>3</sub> (99.0%, Aladdin) and H<sub>3</sub>BO<sub>3</sub> (99.5%, Sinopharm Chemical Reagent Co. Ltd.) were ground and mixed thoroughly in a mortar and loaded into a corundum crucible. Then, the mixture was heated at 850°C for 48 hours with an intermediate grind. NaBO<sub>2</sub> polycrystalline raw material was synthesized following a similar procedure, using Na<sub>2</sub>CO<sub>3</sub> (99.8%, Sinopharm Chemical Reagent Co. Ltd.) and H<sub>3</sub>BO<sub>3</sub> as the reactants and heating the mixture at 700°C.

BaB<sub>2</sub>O<sub>4</sub> and NaBO<sub>2</sub> polycrystalline raw materials were mixed with a molar ratio of BaB<sub>2</sub>O<sub>4</sub>: NaBO<sub>2</sub> = 3:4, heated in a platinum crucible, and eventually melted into a uniform high temperature solution. The solution temperature was carefully adjusted until the saturation point (876 °C) was reached. After that, a BaB<sub>2</sub>O<sub>4</sub> seed crystal was immersed in the saturated solution and started to grow. During the growth process, the cooling rate was kept at 1.0°C/day and the crystal rotation rate was kept at 5 rpm. Finally, transparent single crystals were obtained (Fig. S1a).

The phase of the obtained crystals was identified by the X-ray powder diffraction (XRPD) method. The XRPD patterns were collected on a computer-controlled TTR-III diffractometer equipped with graphite-monochromatized Cu K $\alpha$  radiation ( $\lambda = 1.54056 \text{ \AA}$ ). A typical experimental XRPD pattern is shown in Fig. S1b, which is in good agreement with the standard pattern of  $\beta$ -BaB<sub>2</sub>O<sub>4</sub> (JCPDS No. 24-86), indicating that the product is the  $\beta$ -BaB<sub>2</sub>O<sub>4</sub> crystal.

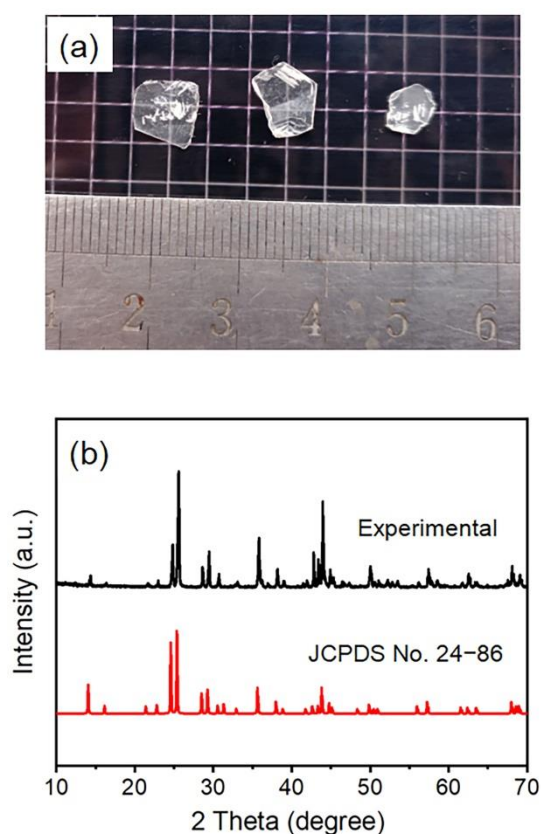

**Fig. S1** (a)  $\beta$ -BaB<sub>2</sub>O<sub>4</sub> crystals grown by the flux method. (b) A typical experimental XRPD pattern of the obtained crystals and the standard XRPD pattern of  $\beta$ -BaB<sub>2</sub>O<sub>4</sub>.

## Computations for the band structures and thermodynamic properties of $\beta$ -BaB<sub>2</sub>O<sub>4</sub> and NaBO<sub>2</sub>

The band structures and thermodynamic properties (*i.e.* the contribution of lattice vibration to the atomic chemical potential in this work) of  $\beta$ -BaB<sub>2</sub>O<sub>4</sub> and NaBO<sub>2</sub> were performed using density functional theory (DFT) implemented in the Cambridge Sequential Total Energy Package (CASTEP).<sup>1</sup> The reported crystal structures of  $\beta$ -BaB<sub>2</sub>O<sub>4</sub> and NaBO<sub>2</sub> were adopted as the initial structural models.<sup>2,3</sup> Plane wave basis sets and norm-conserving pseudo-potentials were used in all computations. According to convergence tests, an energy cutoff of 750 eV was employed to expand the plane waves; a  $2 \times 2 \times 2$  Monkhorst-Pack  $k$ -point grid was used to sum over the Brillouin zones. The valence electron configurations were  $5s^25p^66s^2$  for barium,  $2s^22p^63s^1$  for sodium,  $2s^22p^1$  for boron, and  $2s^22p^4$  for oxygen. The convergence thresholds between two neighboring optimization cycles for the total energy change, maximum displacement, maximum force, and maximum stress were set as  $10^{-6}$  eV/atom, 0.001 Å, 0.03 eV/Å, and 0.05 GPa, respectively.

The Perdew–Burke–Ernzerhof (PBE) functional of the generalized gradient approximation (GGA) was chosen to describe the exchange–correlation energy in the  $\beta$ -BaB<sub>2</sub>O<sub>4</sub>/NaBO<sub>2</sub> structural optimization and in the thermodynamic property study.<sup>4</sup> On the basis of the GGA-PBE optimized structures (with the benchmark volume at 0 K and different expanded volumes at different temperatures), the Heyd–Scuseria–Ernzerhof 06 (HSE06) screened hybrid functional were employed to get accurate band structures.<sup>5</sup>

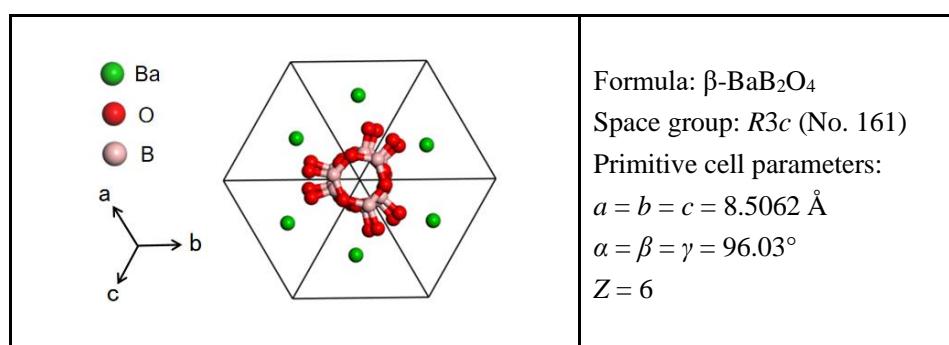

Fig. S2 Optimized structural model and primitive cell parameters of  $\beta$ -BaB<sub>2</sub>O<sub>4</sub>.

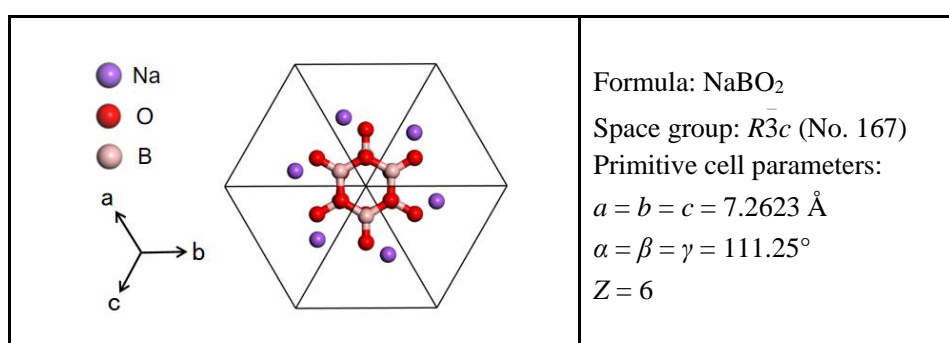

Fig. S3 Optimized structural model and primitive cell parameters of NaBO<sub>2</sub>.

### Estimation of the atomic chemical potentials of $\beta$ -BaB<sub>2</sub>O<sub>4</sub> and NaBO<sub>2</sub>

In density functional theory, the atomic chemical potential (ACP) of a solid (with the chemical formula of  $M_1^{n_1} \dots M_i^{n_i} \dots M_n^{n_n}$ ) is defined as the negative of its electronegativity, and can be estimated through the following formula<sup>6</sup>

$$\mu = - \left[ \prod_{i=1}^n (\chi_{M_i}^{n_i}) \right]^{1/n} \quad (1)$$

where,  $\mu$  is the atomic chemical potential of the solid,  $\chi_{M_i}$  is the electronegativity of the  $i$ th constituent atom,  $n$  is the total number of atoms in the chemical formula ( $n = n_1 + n_2 + \dots + n_n$ ). As shown in Table 1, the calculated ACPs of  $\beta$ -BaB<sub>2</sub>O<sub>4</sub> and NaBO<sub>2</sub> are  $-5.45$  eV and  $-5.14$  eV, respectively, and the calculated ACP difference is  $0.315$  eV.

**Table. S1** Atomic chemical potentials (ACPs) of  $\beta$ -BaB<sub>2</sub>O<sub>4</sub> and NaBO<sub>2</sub>

| Crystal                                  | Atom | $\chi_M^a$ | ACP (eV) | ACP difference (eV) |
|------------------------------------------|------|------------|----------|---------------------|
| $\beta$ -BaB <sub>2</sub> O <sub>4</sub> | Ba   | 2.40       | $-5.45$  | $0.31$ eV           |
|                                          | B    | 4.29       |          |                     |
|                                          | O    | 7.54       |          |                     |
| NaBO <sub>2</sub>                        | Na   | 2.85       | $-5.14$  |                     |
|                                          | B    | 4.29       |          |                     |
|                                          | O    | 7.54       |          |                     |

<sup>a</sup>  $\chi_M$  is the electronegativity of the constituent atom on Mulliken scale.<sup>7</sup>

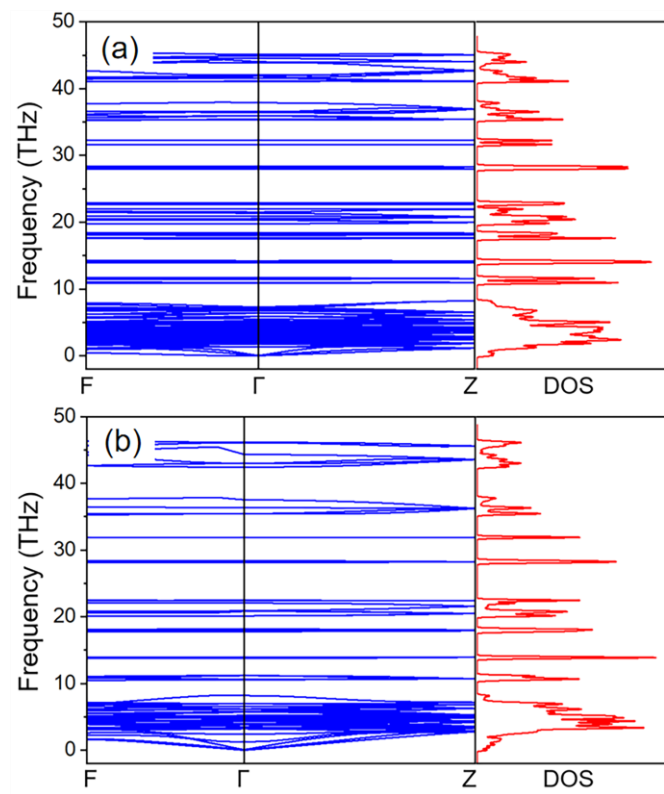

**Fig. S4** Computational phonon dispersions (blue lines) and densities of states (red lines) for (a)  $\beta$ -BaB<sub>2</sub>O<sub>4</sub> and (b) NaBO<sub>2</sub>.

**Table. S2** Primitive cell parameters of  $\beta$ -BaB<sub>2</sub>O<sub>4</sub> and NaBO<sub>2</sub> at different volume expansion rates

| $\Delta V/V$ (%) | $\beta$ -BaB <sub>2</sub> O <sub>4</sub> <sup>a</sup> |              |                       | NaBO <sub>2</sub> <sup>a</sup> |              |                       |
|------------------|-------------------------------------------------------|--------------|-----------------------|--------------------------------|--------------|-----------------------|
|                  | $a$ (Å)                                               | $\alpha$ (°) | $V$ (Å <sup>3</sup> ) | $a$ (Å)                        | $\alpha$ (°) | $V$ (Å <sup>3</sup> ) |
| 0                | 8.5062                                                | 96.03        | 604.45                | 7.2623                         | 111.25       | 273.68                |
| 2                | 8.5554                                                | 95.62        | 616.54                | 7.2909                         | 111.08       | 279.15                |
| 4                | 8.6040                                                | 95.18        | 628.63                | 7.3174                         | 110.89       | 284.62                |
| 6                | 8.6524                                                | 94.74        | 640.72                | 7.3410                         | 110.68       | 290.10                |
| 8                | 8.7006                                                | 94.29        | 652.81                | 7.3644                         | 110.47       | 295.57                |
| 10               | 8.7477                                                | 93.75        | 664.90                | 7.3865                         | 110.24       | 301.05                |

<sup>a</sup>  $\beta$ -BaB<sub>2</sub>O<sub>4</sub> and NaBO<sub>2</sub> crystallize in the trigonal crystal system; therefore,  $a = b = c$ ,  $\alpha = \beta = \gamma$ .

**Table. S3** Computational valence-band-edge ( $E_{VB}$ ) and conduction-band-edge ( $E_{CB}$ ) positions of  $\beta$ -BaB<sub>2</sub>O<sub>4</sub> and NaBO<sub>2</sub> with different expansion ratios and the corresponding atomic chemical potentials

| $\Delta V/V$ (%) | $\beta$ -BaB <sub>2</sub> O <sub>4</sub> |               |          | NaBO <sub>2</sub> |               |          |
|------------------|------------------------------------------|---------------|----------|-------------------|---------------|----------|
|                  | $E_{CB}$ (eV)                            | $E_{VB}$ (eV) | ACP (eV) | $E_{CB}$ (eV)     | $E_{VB}$ (eV) | ACP (eV) |
| 0                | 5.728                                    | -0.671        | 2.528    | 5.587             | -0.0017       | 2.793    |
| 2                | 5.544                                    | -0.776        | 2.384    | 5.387             | -0.121        | 2.633    |
| 4                | 5.367                                    | -0.881        | 2.243    | 5.195             | -0.234        | 2.481    |
| 6                | 5.197                                    | -0.981        | 2.108    | 5.011             | -0.339        | 2.336    |
| 8                | 5.034                                    | -1.077        | 1.978    | 4.834             | -0.440        | 2.197    |
| 10               | 4.873                                    | -1.178        | 1.847    | 4.666             | -0.535        | 2.065    |

## References

- 1 V. Milman, K. Refson, S. J. Clark, C. J. Pickard, J. R. Yates, S. P. Gao, P. J. Hasnip, M. I. J. Probert, A. Perlov and M. D. Segal, *J. Mol. Struct.: THEOCHEM*, 2010, **954**, 22–35.
- 2 R. Fröhlich, *Z. Kristallogr.*, 1984, **168**, 109–112.
- 3 M. Marezio, H. A. Plettinger and W. H. Zachariasen, *Acta. Cryst.*, 1963, **16**, 594–595.
- 4 J. P. Perdew, K. Burke, and M. Ernzerhof, *Phys. Rev. Lett.*, 1996, **77**, 3865–3868.
- 5 J. Heyd, G. E. Scuseria and M. Ernzerhof, *J. Chem. Phys.*, 2003, **118**, 8207–8215.
- 6 M. Aniya, *Solid State Ionics*, 1995, **79**, 259–263.
- 7 R. G. Pearson, *Inorg. Chem.*, 1988, **27**, 734–740.
